# Supplementary material for: Bacterial Compatibility/Toxicity of Biogenic Silica (b-SiO2) Nanoparticles Synthesized from Biomass Rice Husk Ash
Source: PubMed Central journal article supplement (PMC6835479; doi:10.3390/nano9101440), 2019-10-11

*Article*

# **Bacterial Compatibility/Toxicity of Biogenic Silica (b-SiO<sub>2</sub>) Nanoparticles Synthesized from Biomass Rice Husk Ash**

**Sanjeev K. Sharma**<sup>1,2,3</sup>, **Ashish R. Sharma**<sup>2</sup>, **Sudheer D. V. N. Pamidimarri**<sup>4</sup>, **Jyotshana Gaur**<sup>1</sup>, **Beer Pal Singh**<sup>1</sup>, **Sankar Sekar**<sup>3</sup>, **Deuk Young Kim**<sup>3,\*</sup> and **Sang Soo Lee**<sup>2,\*</sup>

<sup>1</sup> Department of Physics, C.C.S. University, Meerut Campus, Meerut UP 250004, India; sanjeevlrs73@gmail.com (S.K.S.); jyotshanaphysics@gmail.com (J.G.); drbeerpal@gmail.com (B.P.S.)

<sup>2</sup> Institute for Skeletal Ageing & Orthopedic Surgery, Hallym University-Chuncheon Sacred Heart Hospital, Chuncheon, Gangwon-Do 24253, Korea; boneresearch@hallym.ac.kr

<sup>3</sup> Division of Physics and Semiconductor Science, Dongguk University-Seoul, Seoul 04620, Korea; sanssekar@gmail.com

<sup>4</sup> Institute of Biotechnology, Amity University, Raipur, Chhattisgarh 493225, India; pdvnsudheer@gmail.com

\* Correspondence: dykim@dongguk.edu (D.Y.K.); 123sslee@gmail.com (S.S.L.)

Received: 28 July 2019; Accepted: 2 October 2019; Published: 11 October 2019

Figure S1: XRD

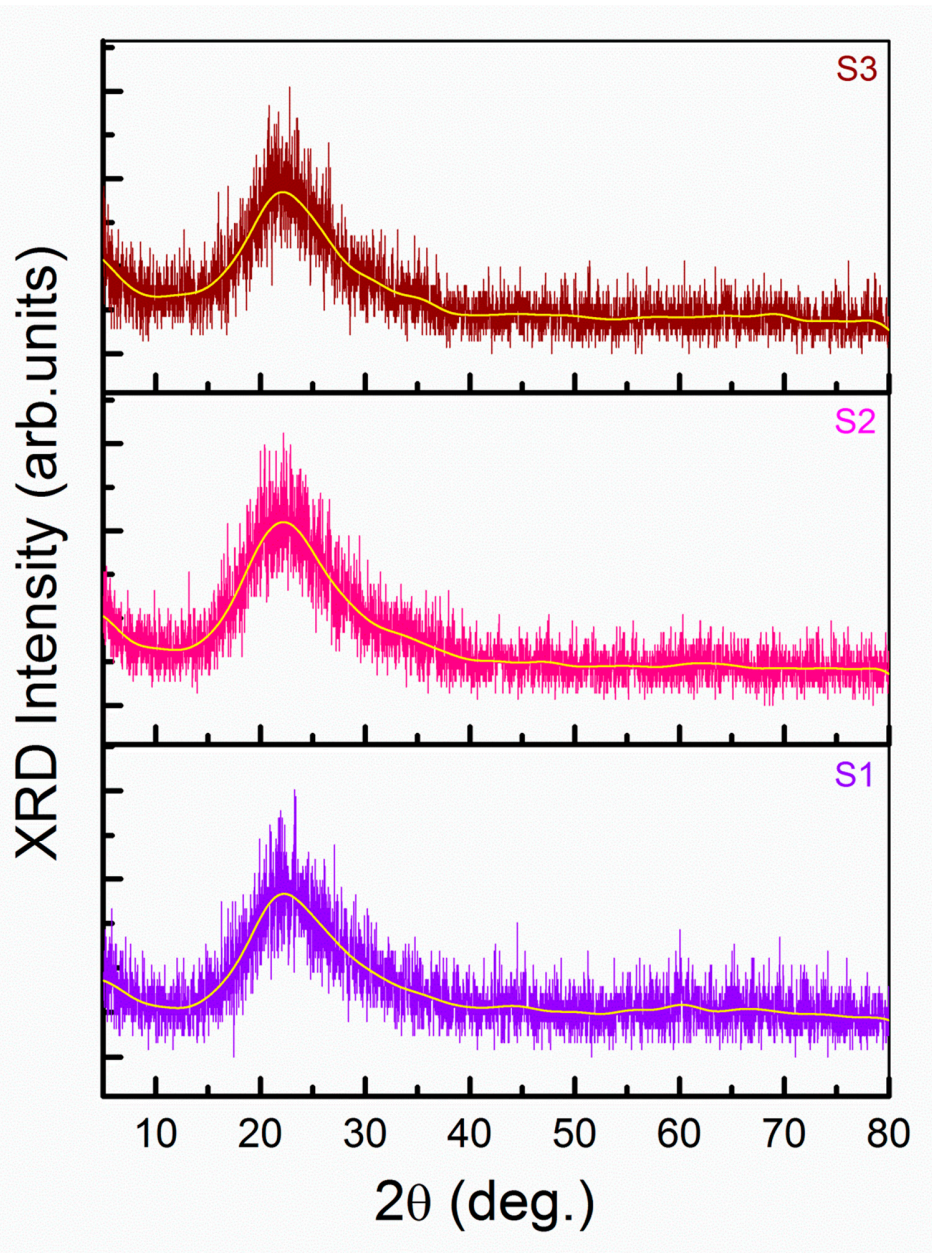

Figure S2: EDAX spectra

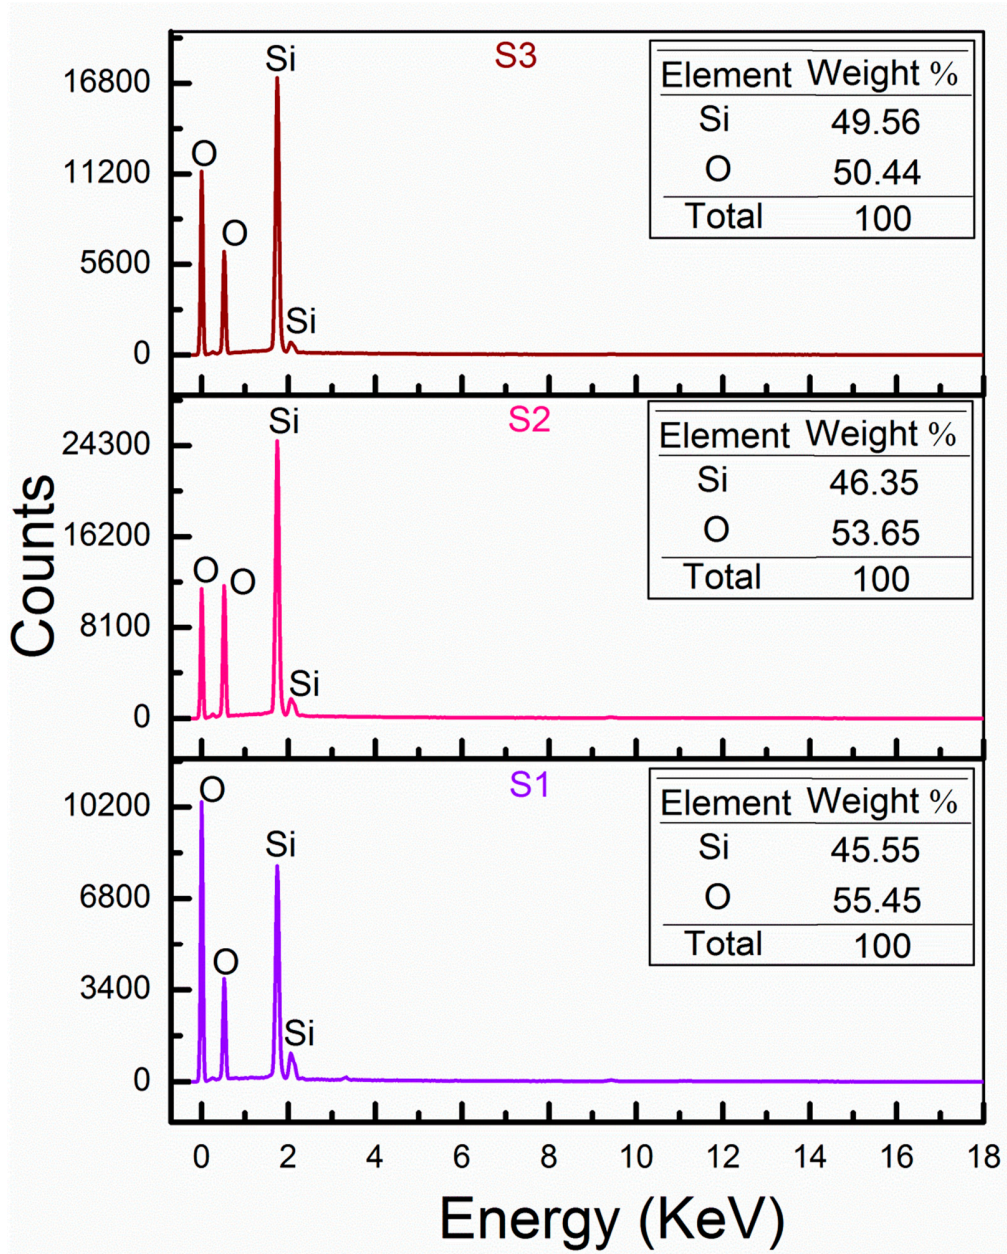

**Figure S3: BET surface analysis**

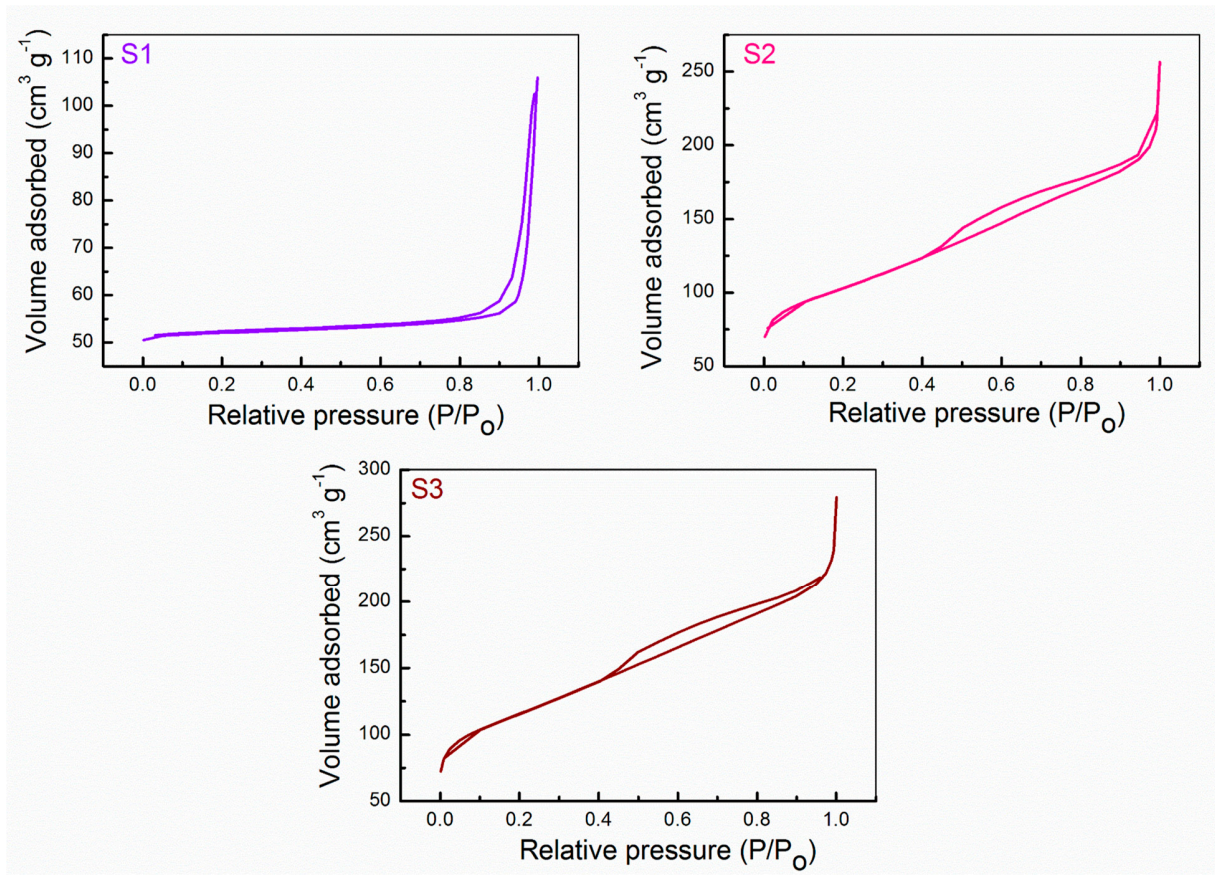

Figure S4: After sonication the bacterial growth of E.coli and S.aureus

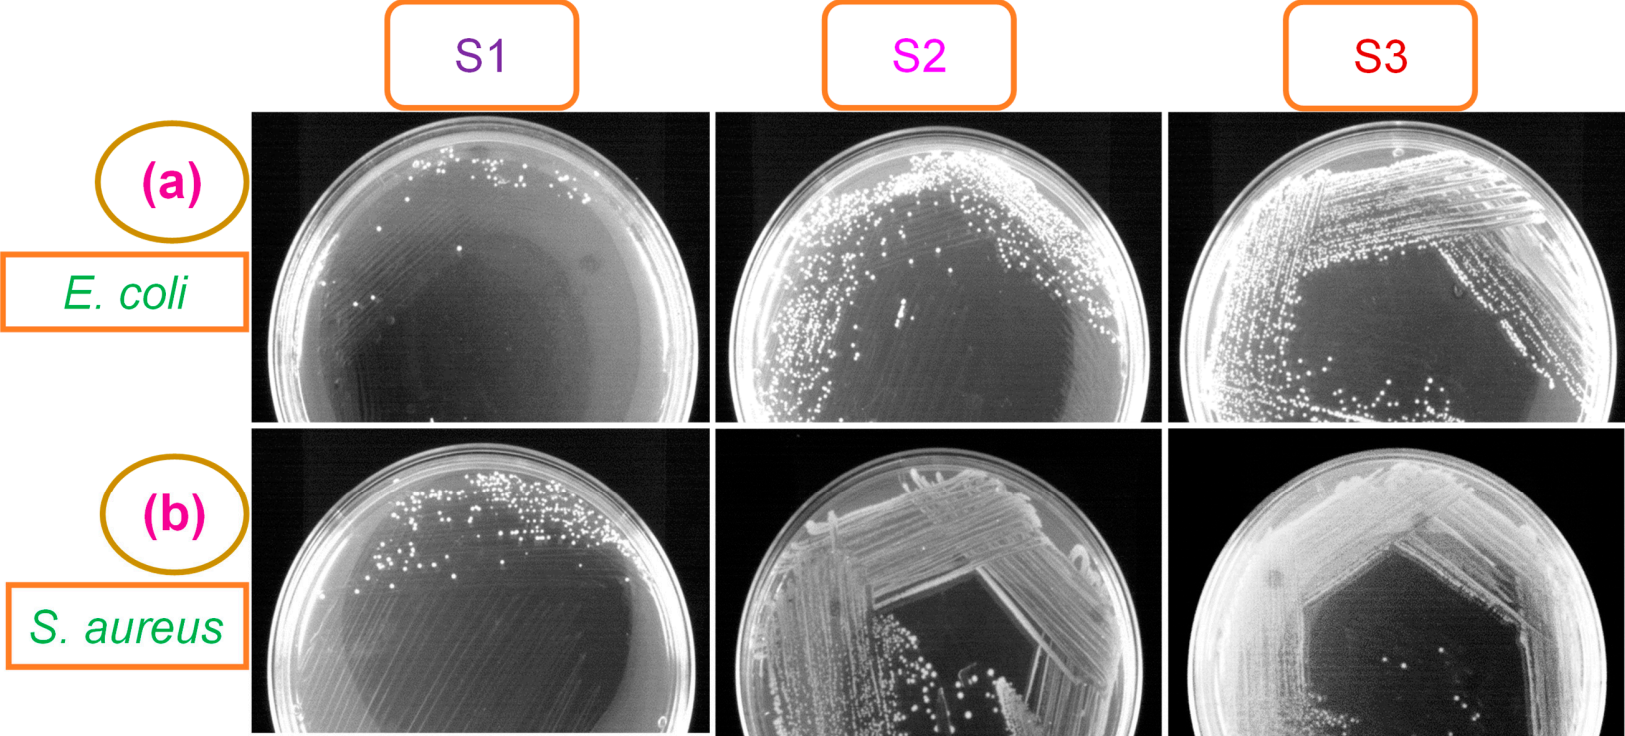

Supplement: nanomaterials-09-01440-s001.pdf [file nanomaterials-09-01440-s001.pdf]
